# Supplementary material for: High-speed super-resolution imaging of rotationally symmetric structures using SPEED microscopy and 2D-to-3D transformation
Source: Springer Nature journal article supplement (doi:10.1038/s41596-020-00440-x), 2020-12-14
Supplement: MOESM1 [file 41596_2020_440_MOESM1_ESM21.pdf]

---

**Supplementary information**

---

**High-speed super-resolution imaging of rotationally symmetric structures using SPEED microscopy and 2D-to-3D transformation**

---

In the format provided by the  
authors and unedited

## Supplementary material

### Matrix calculation for 2D-to-3D Transformation

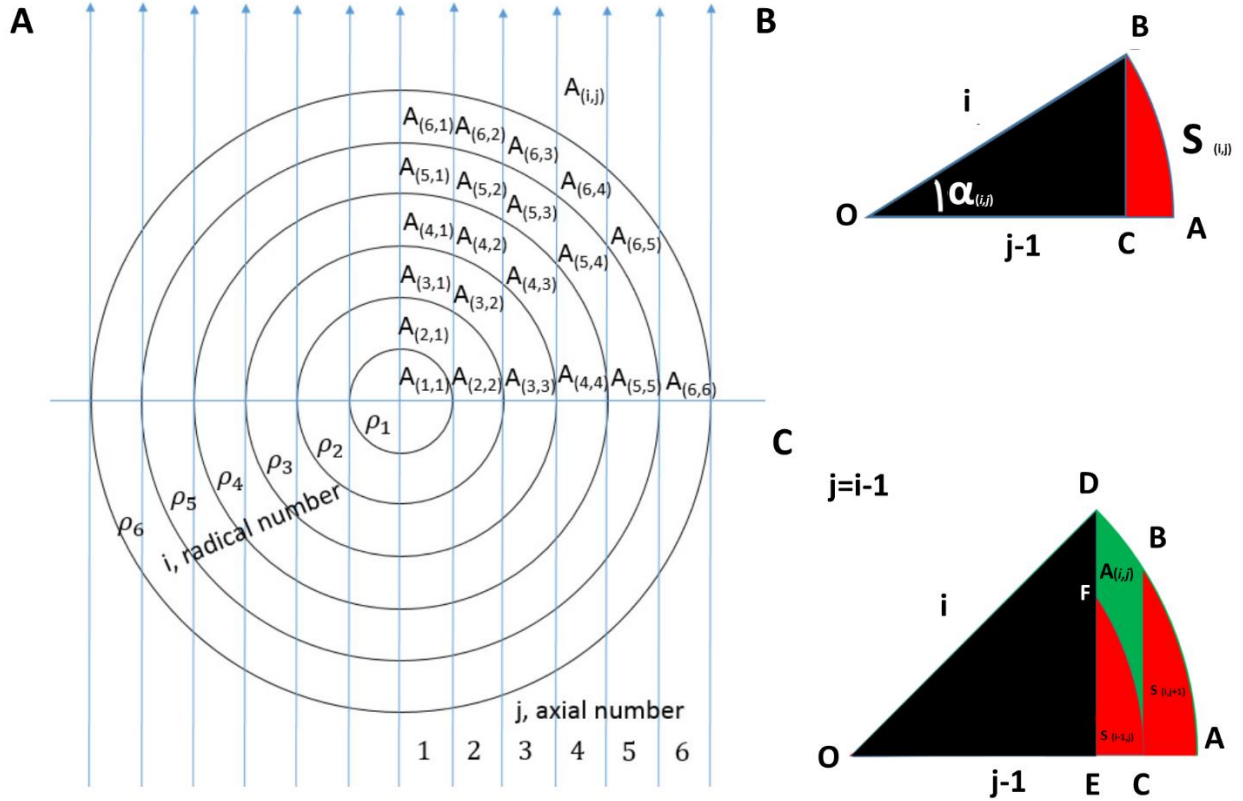

#### Supplementary figure 1: *Determining the area of each subsection in the 2D-to-3D*

**transformation area matrix.** A) Labeled area matrix which reflects the contribution of each ring to the 2D distribution. We define  $i$  as the radial number and  $j$  as the axial number. The density of single molecule locations along radius  $i$  is assumed to be uniform given the radial symmetry and the density is labeled as  $\rho_i$  here. The cross-section of radial number  $i$  and axial number  $j$  is defined as  $A_{(i,j)}$ . In the following equations,  $\Delta r$  is the bin size,  $\rho_i$  is the density of molecules in the  $i$ th ring,  $h$  is the half of illumination depth and  $p$  is the constant background density outside the region of interest. B) To determine the area of each sub-region  $A_{(i,j)}$ , it is necessary to calculate the area of the fan-shape area at  $j=i$ , in which:

$$\cos \alpha_{(i,j)} = \frac{j-1}{i} \quad \sin \alpha_{(i,j)} = \frac{\sqrt{i^2 - (j-1)^2}}{i} \quad \alpha_{(i,j)} = \cos^{-1} \frac{j-1}{i}$$

The red-shaded area is defined as  $S(i,j)$ :

$$\begin{aligned}
 S_{(i,j)} &= S_{ABC} = S_{AOB} - S_{BOC} \\
 S_{(i,j)} &= \frac{1}{2} \alpha_{(i,j)} i^2 \Delta r^2 - \frac{1}{2} \sin \alpha_{(i,j)} \cos \alpha_{(i,j)} i^2 \Delta r^2 \\
 S_{(i,j)} &= \frac{1}{2} \left[ \cos^{-1} \frac{j-1}{i} \right] i^2 \Delta r^2 - \frac{1}{2} \left[ \frac{\sqrt{i^2 - (j-1)^2}}{i} \right] \left( \frac{j-1}{i} \right) i^2 \Delta r^2
 \end{aligned} \tag{Eq.1}$$

C) When  $j \neq i$  and  $i > j$ , we need to calculate the area of the green-shaded region as follows:

$$S_{CBDF} = S_{ADE} - S_{CFE} - S_{ABC} \qquad S_{GMRP} = S_{AQP} - S_{CQR} - S_{AHG} + S_{CMH}$$

$$A_{(i,j)} = S_{(i,j)} - S_{(i-1,j)} - S_{(i,j+1)} + S_{(i-1,j+1)} \tag{Eq. 2}$$

$$\text{When } i < j, A_{(i,j)} = 0 \tag{Eq. 3}$$

Following the above equations, all  $A(i,j)$  can be precisely calculated. Finally,  $N_j$ , the number of events detected in the  $j$ th column can be calculated with the following equation:

$$N_j = 2 \left\{ \sum_{i=j}^n \rho_i A_{(i,j)} + [h\Delta r - \sum_{i=j}^n A_{(i,j)}] \rho \right\} \tag{Eq. 4}$$

As soon as  $N_j$  and  $A(i,j)$  are known,  $\rho_i$  will be calculated.
